# Supplementary material
Source: Springer Nature journal article supplement (https://www.springermedizin.de/resource/supplementary/12936_2008_645_MOESM4_ESM.pdf/9547904)

**a.**

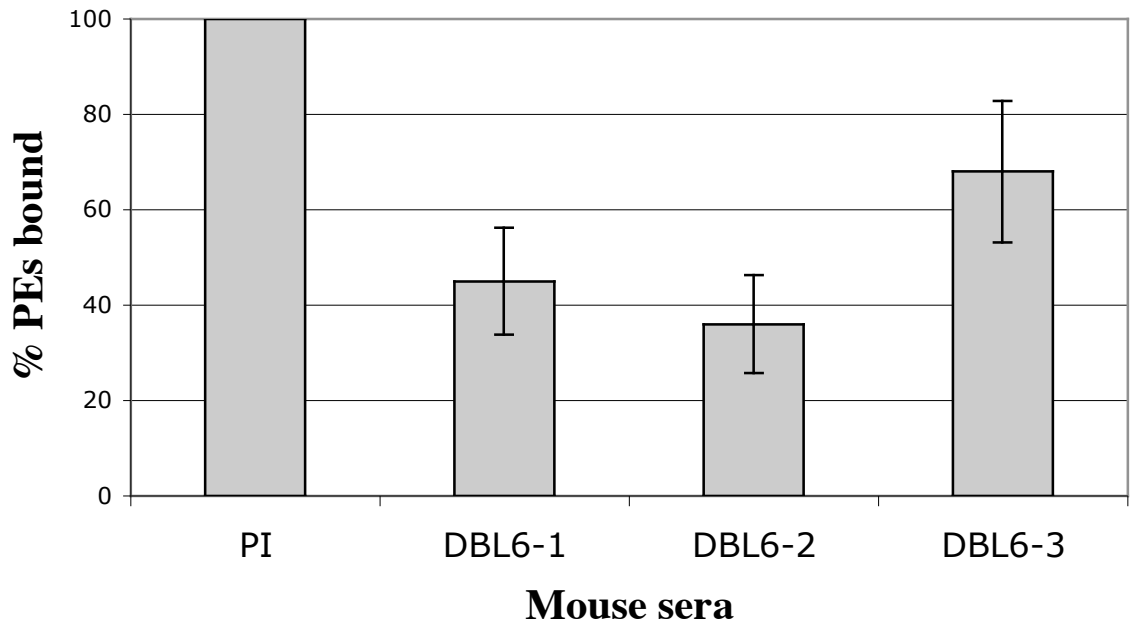

**b.**

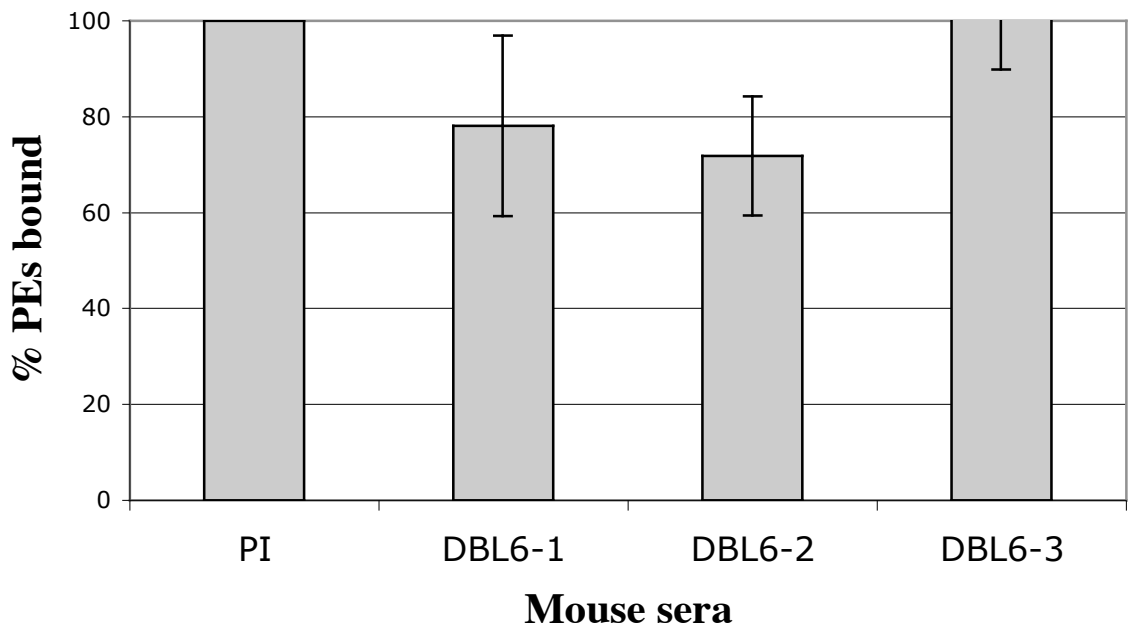

Supplement: MOESM4 [file 9547904]
